# Supplementary material
Source: publisher figshare collection journal article supplement (https://tandf.figshare.com/ndownloader/files/28864252)
Supplement: Supplementary file 1 [file 28864252]

## Supplementary data

**Regioselective synthesis of 6´´-O-lauroyl-1-kestose and 6´´´-O-lauroylnystose by sequential enzymatic reactions of transfructosylation and acylation**

Amador Roberto Campos-Valdeza, Leticia Casas-Godoyb, Georgina Coral Sandoval Fabiana, Lázaro Hernándezc, Guilherme Lanzi Sassakid, Leociley Rocha Alencar de Menezesd, José Campos Teráne, Dolores Reyes Duartee, Javier Placido Arrizon-Gaviñoa*.

a Centro de Investigación y Asistencia en Tecnología y Diseño del Estado de Jalisco A.C., Av. Normalistas 800, Col. Colinas de la Normal, C.P. 44270 Guadalajara, Jal., México. acampos_posdoc@ciatej.edu.mx, gsandoval@ciatej.mx, jparrizon@ciatej.mx

b CONACYT-Centro de Investigación y Asistencia en Tecnología y Diseño del Estado de Jalisco A.C., Camino Arenero 1227, Col. El Bajío C.P. 45019 Zapopan, Jal., México. lcasas@ciatej.mx

c Centro de Ingeniería Genética y Biotecnología (CIGB), Grupo Tecnología de Enzimas, Apartado Postal 6162, La Habana 10600, Cuba. lazaro.hernandez@cigb.edu.cu

d Federal University of Parana, Department of Biochemistry and Molecular Biology, Curitiba, Paraná, 81.531-980, Brazil. guilherme.sassaki@gmail.com

e Universidad Autónoma Metropolitana-Unidad Cuajimalpa, Departamento de Procesos y Tecnología, Av. Vasco de Quiroga 4871, Col. Santa Fe Cuajimalpa, Delegación. Cuajimalpa de Morelos 05348 CDMX, México. jcampos@cua.uam.mx, dreyes@cua.uam.mx.

* Corresponding author: Tel.: +523333455200 Ext. 1340 Email: jparrizon@ciatej.mx

**Keywords**: Acylation; Fructooligosaccharides; Sequential enzymatic process; Sugar esters; Transfructosylation; Acylation.


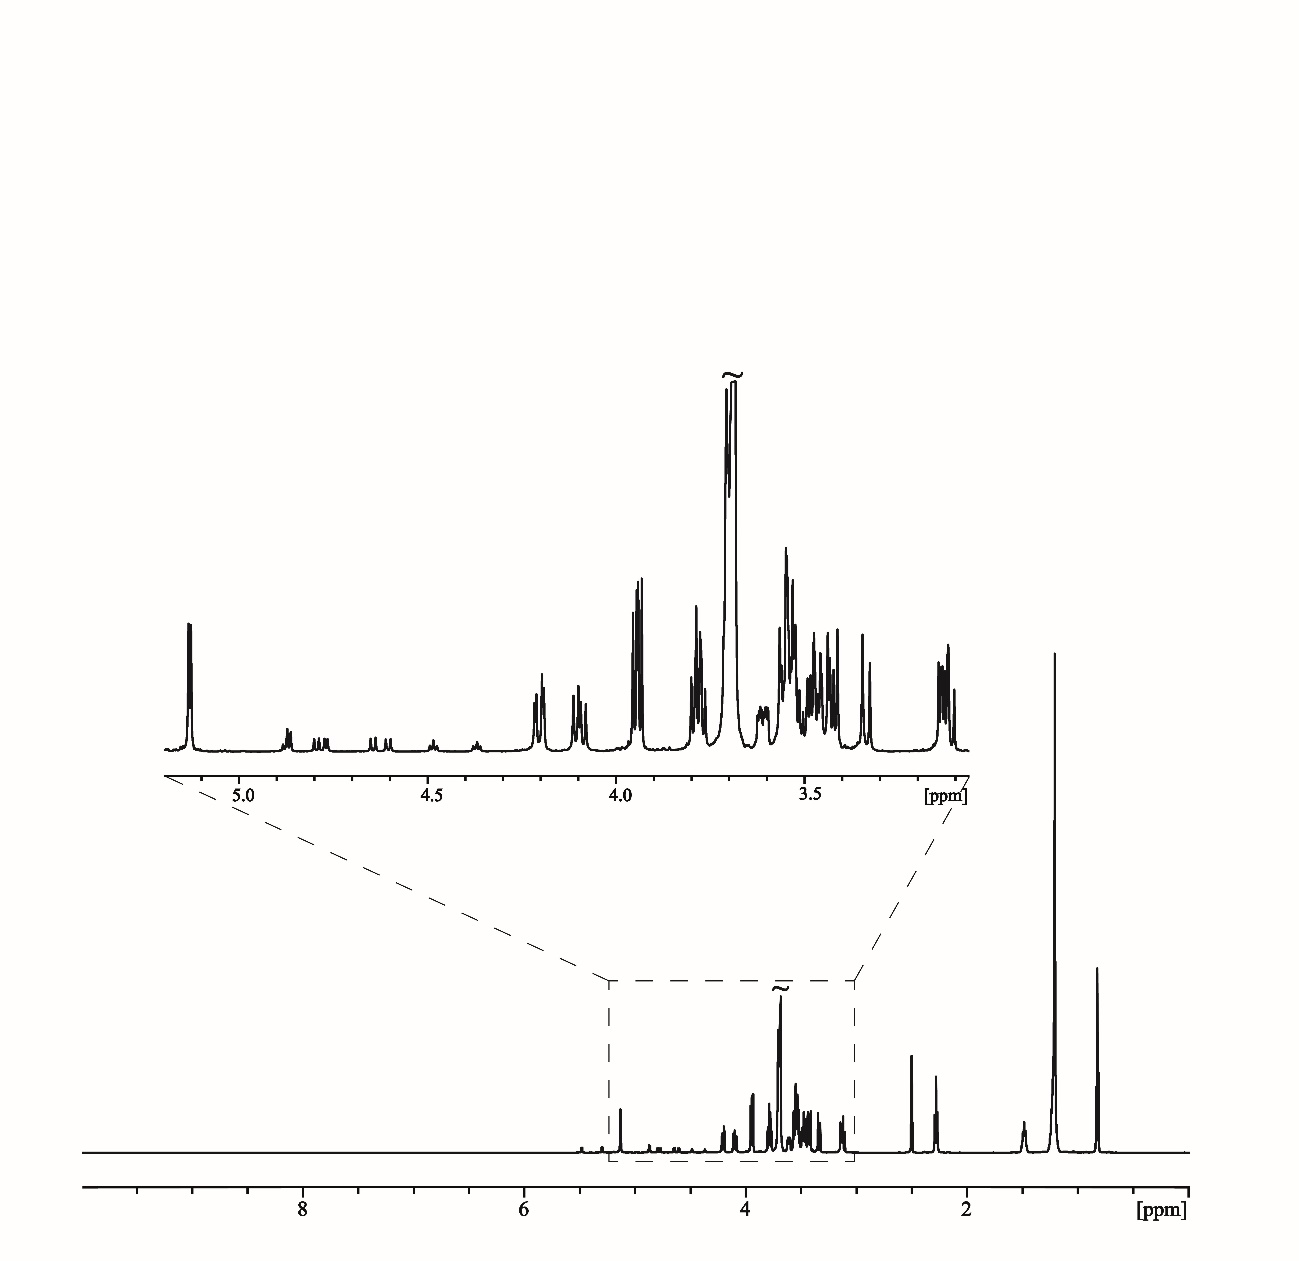


**Figure S 1.** 1H NMR spectrum of 6’’-O-lauroyl-1-kestose (DMSO-d6 with drops of D2O, 303 K, 600 MHz).


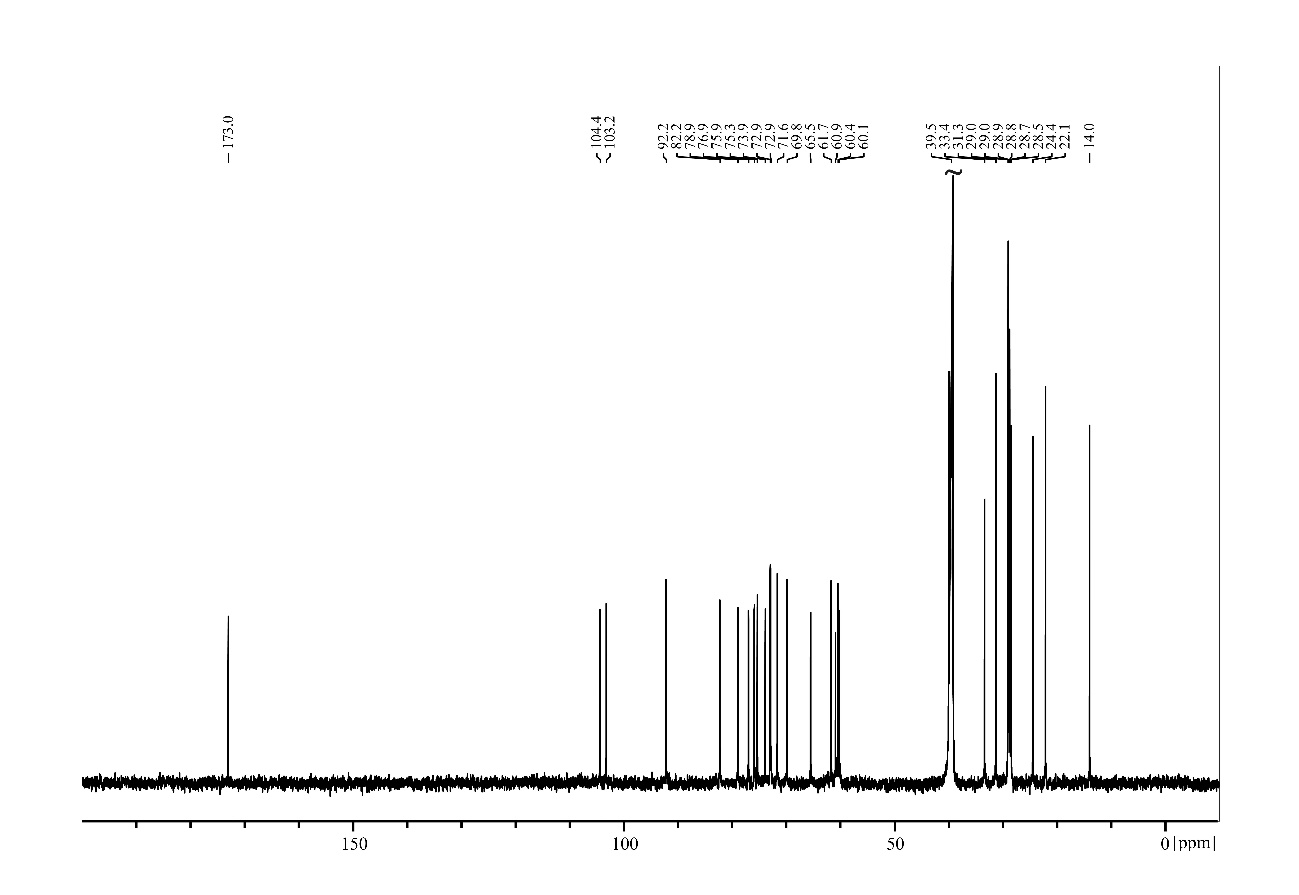


**Figure S 2.** 13C{1H} NMR spectrum of 6’’-O-lauroyl-1-kestose (DMSO-d6, 298 K, 150 MHz).


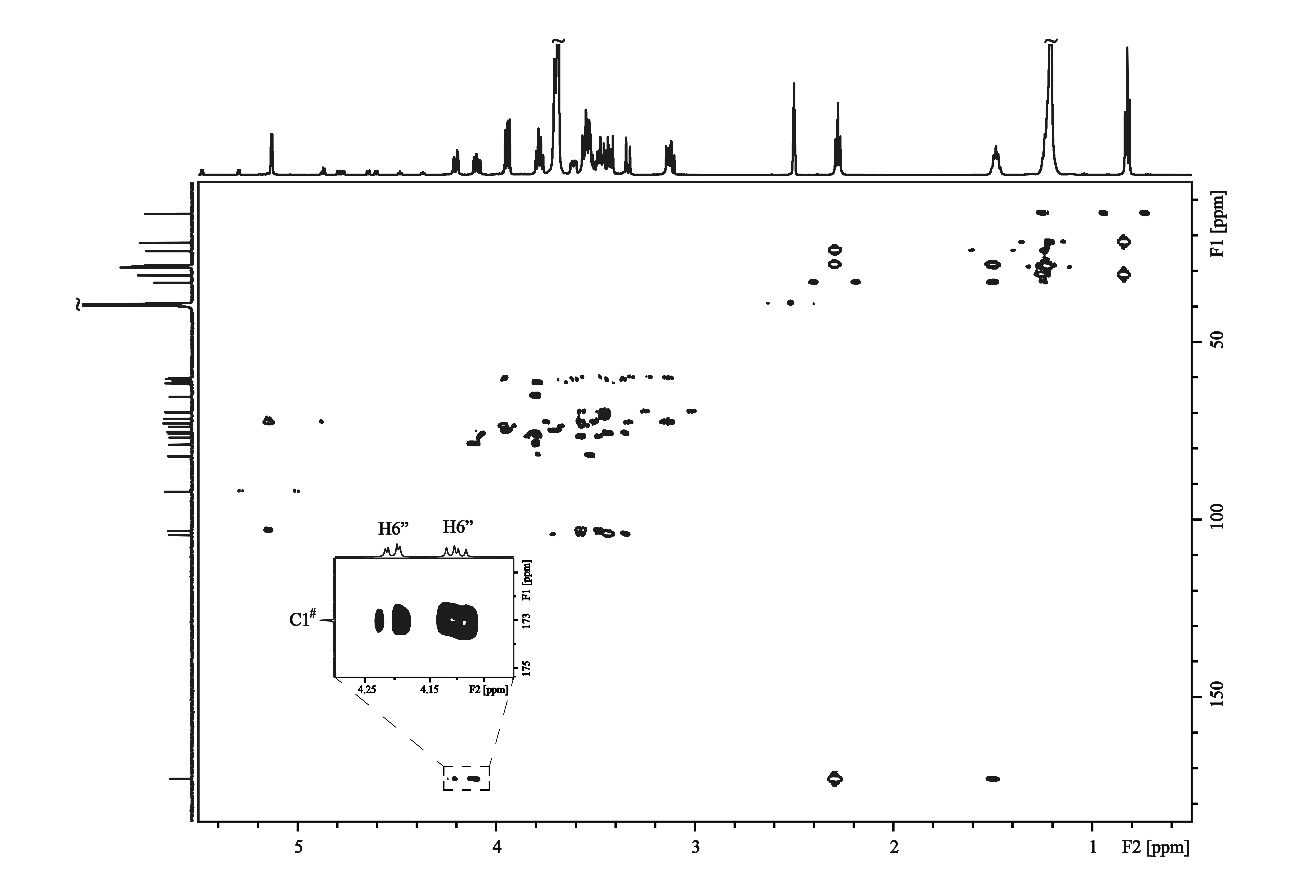


**Figure S 3.** Long-range 1H-13C correlation map from HMBC NMR experiment of 6’’-O-lauroylkestose (DMSO-d6 with drops of D2O, 303 K, at 600 (1H) and 150 MHz (13C), respectively).


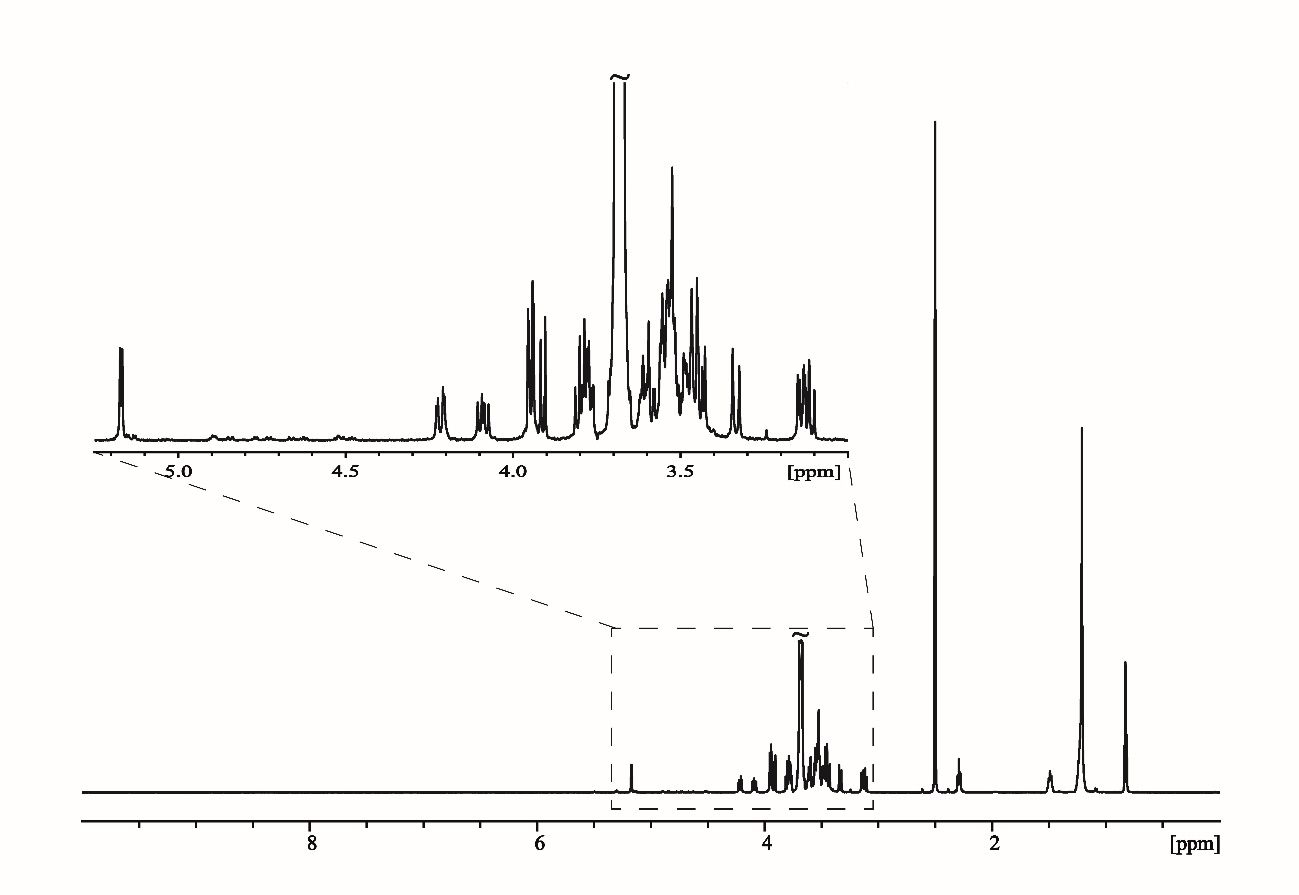


**Figure S 4.** 1H NMR spectrum of 6’’’-O-lauroylnystose (DMSO-d6 with drops of D2O, 298 K, 600 MHz).


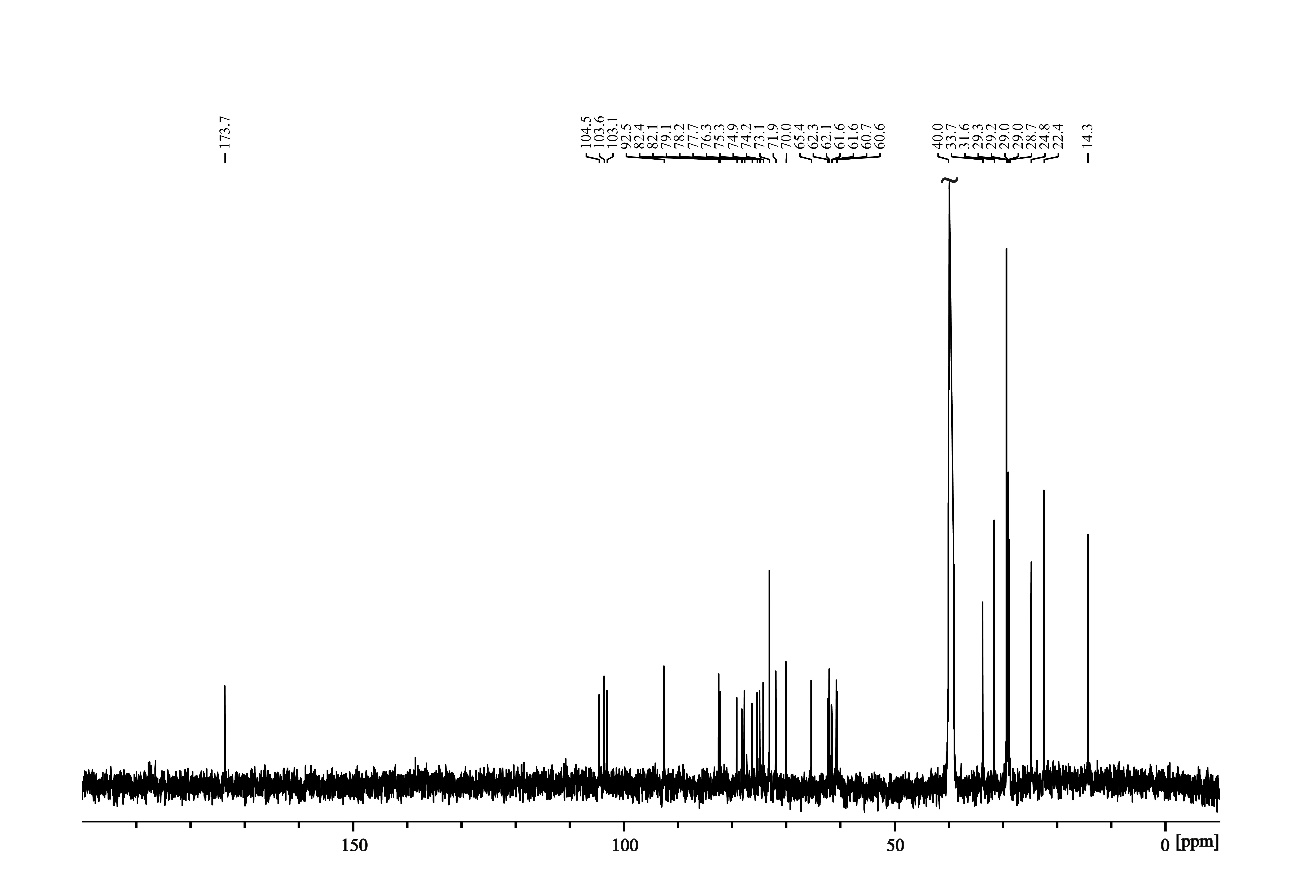


**Figure S5.** 13C{1H} NMR spectrum of 6’’’-O-lauroylnystose (DMSO-d6 with drops of D2O, 298 K, 150 MHz).


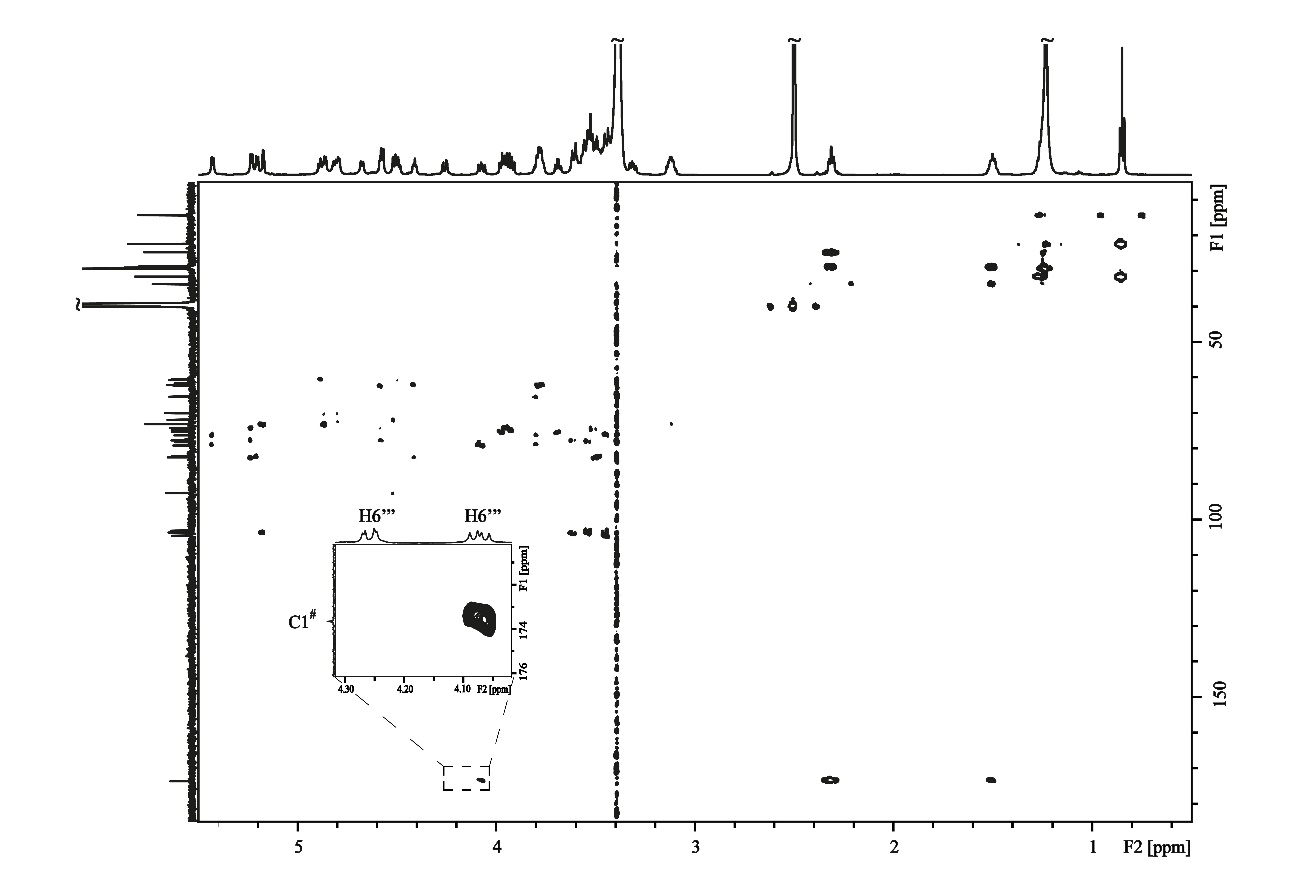


**Figure S 6.** Long-range 1H-13C correlation map from HMBC NMR experiment of 6’’’-O-lauroylnystose (DMSO-d6, 288 K, at 600 (1H) and 150 MHz (13C), respectively).
